# Supplementary material for: Preclinical Studies on the Effect of Rucaparib in Ovarian Cancer: Impact of BRCA2 Status
Source: MDPI journal article supplement (doi:10.3390/cells10092434), 2021-09-15
Supplement: s1 [file s1]

**Table S1.** Patient characteristics. NACT: neo-adjuvant chemotherapy.

| BRCA status | Age (years) | Treatment              | $\gamma$ -H2AX /100 cells |
|-------------|-------------|------------------------|---------------------------|
| Mutant      | 77          | NACT with surgery      | 21                        |
| Mutant      | 54          | NACT with surgery      | 10                        |
| Mutant      | 52          | Chemotherapy/Cisplatin | 6                         |
| Wild type   | 62          | NACT with surgery      | 2                         |
| Wild type   | 85          | NACT with surgery      | 2                         |
| Wild Type   | 53          | NACT with surgery      | 1                         |

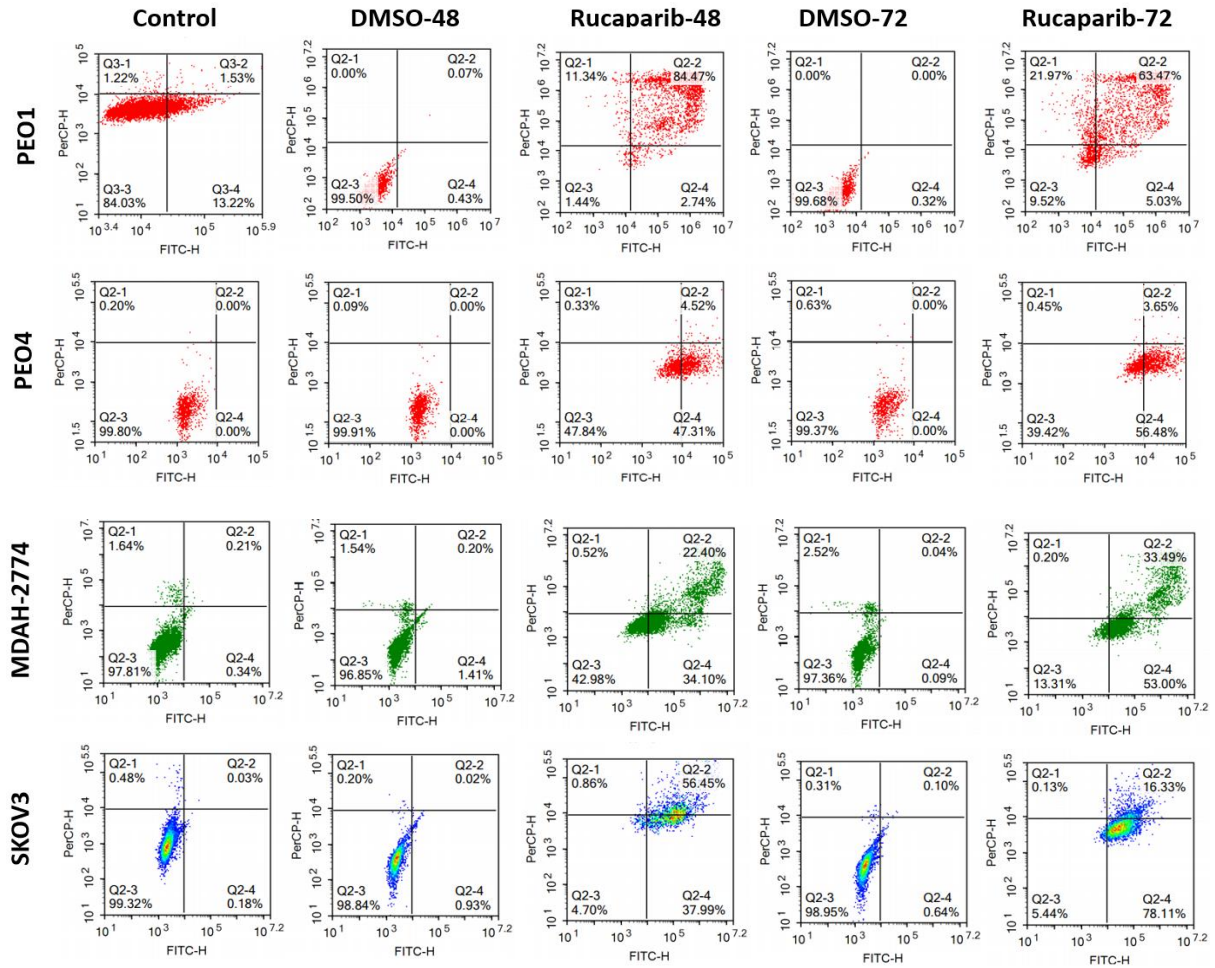

**Figure S1.** Flow cytometry analysis with annexin V and propidium iodide staining in PEO1, PEO4, MDAH-2774 and SKOV3 cells showed a significant increase of apoptotic population (early apoptosis; annexin V+/PI-, late apoptosis; annexin V+/PI+) with treatment of 10  $\mu$ M rucaparib. Flow cytometry analysis was performed 48-hrs and 72-hrs after treatment of rucaparib.
